# Supplementary material for: Molecular determinants of response to high-dose androgen therapy in prostate cancer
Source: JCI journal article supplement (doi:10.1172/jci.insight.129715), 2019-09-11
Supplement: sd1 [file 1]

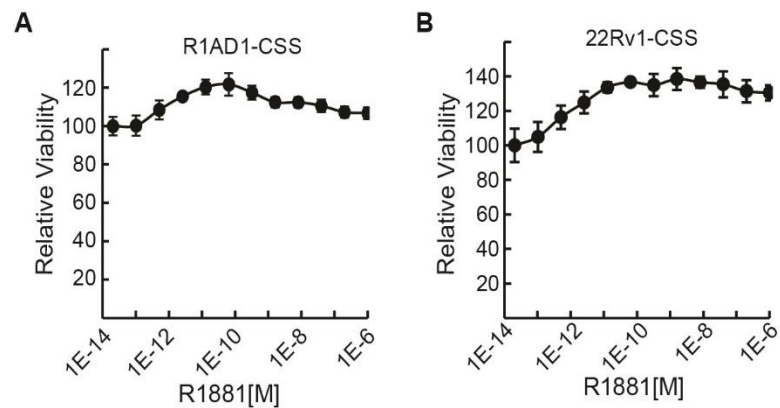

**Supplementary Figure1: Suppression of prostate cancer viability by androgen in CSS conditions.** Relative viability (Celltiter-glo) of PC cell lines is measured in response to a dose-range of the androgen R1881 (n=4) in 10% CSS media after five days in culture for **A**) R1AD1, **B**) 22Rv1.

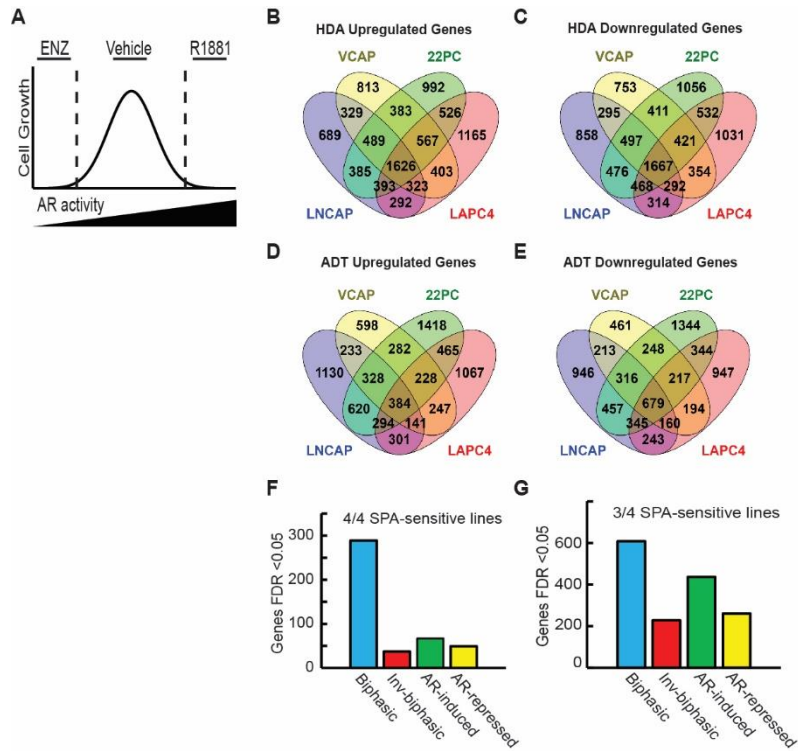

**Supplementary Figure 2: The androgen receptor regulated genes.** **A**) Diagram of biphasic growth changes in response to AR-modulating drugs. **B**) Venn-diagram of gene expression changes determined by RNA-seq as significantly **B**) upregulated or **C**) downregulated after 48hrs of 10nM R1881 treatment in normal growth media for four PC cell lines (FDR<0.05). **D**) Genes upregulated or **E**) downregulated in response to a 48hr treatment of 10uM ENZ. Numbers of significant (FDR<0.05) genes in each AR subset shared between all **F**) four cell lines or **G**) any three out of four cell lines.

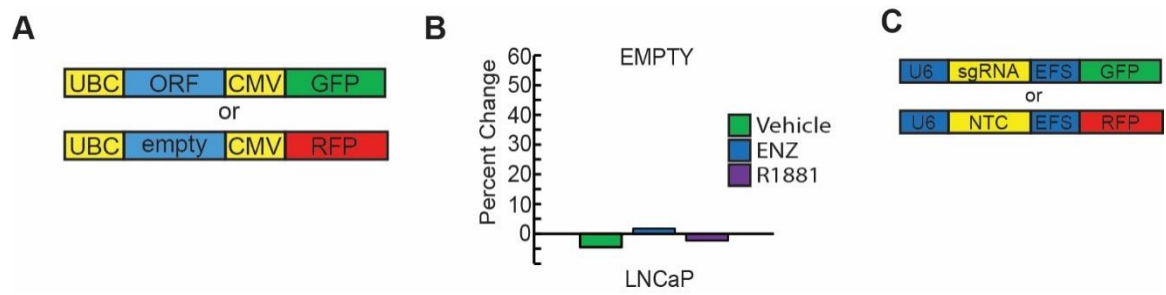

**Supplementary Figure3:** **A)** Vectors used in ORF competition assay. **B)** Change in percentage of cells from day 0 containing either a GFP-empty or an RFP-empty vector over 25 days cultured with vehicle, 10uM ENZ, or 10nM R1881. **C)** Vectors used in sgRNA competition assay
